# Supplementary material
Source: PubMed Central journal article supplement (PMC2582561)

Figure 3S

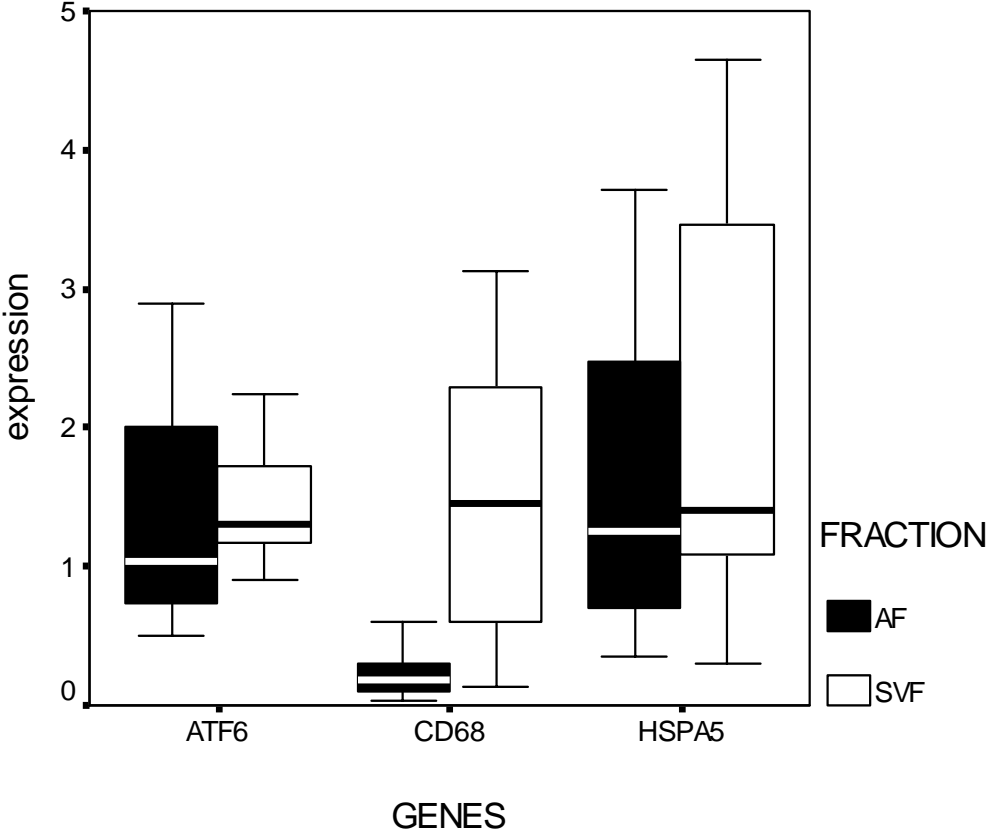

Supplement: jc.2008-1001_8.pdf [file jc.2008-1001_8.pdf]
